# Supplementary material for: Mice homozygous for c.451C>T mutation in Cln1 gene recapitulate INCL phenotype
Source: PubMed Central journal article supplement — Ann Clin Transl Neurol. 2014 Nov 18;1(12):1006–23. doi: 10.1002/acn3.144 (PMC4284126; doi:10.1002/acn3.144), 2014-11-18

## **Supporting Information**

### **Figure S1: Confirmation of c.451 C > T mutation in targeted ES clones**

(A) The c.451 C > T (R151X) mutations in targeted ES clones were confirmed by direct DNA sequencing. The arrow shows the mutation site (C > T). (B) Schematic of the PCR-based genotype analysis. The sequences of primers were listed in the Materials and Methods.

### **Figure S2: Biochemical analysis of Catalase and NeuN levels**

(A) The *Catalase*-mRNA levels in the brain tissues of *Ppt1*-KI as well as those of their WT littermates. The *Catalase*-mRNA levels in *Ppt1*<sup>-/-</sup> mice were used as a control. The results are presented as the mean (n=12) ± SD. (B) Western blot analysis of brain tissues from *Ppt1*-KI mice and those of their WT littermates. Brain tissues from *Ppt1*<sup>-/-</sup> mice were used for comparison. β-actin was used as a loading control. (C) The *NeuN*-mRNA levels in the brain tissues of *Ppt1*-KI as well as in those of their WT littermates. The *NeuN*-mRNA levels in *Ppt1*<sup>-/-</sup> mice were used as control. The results are presented as the mean (n=12) ± SD. (D) Western blot analysis of brain tissues from *Ppt1*-KI mice and those of their WT littermates. Brain tissues from *Ppt1*<sup>-/-</sup> mice were used as a control. β-actin was used as a loading control. \*p < 0.05, \*\*p < 0.01, \*\*\*p < 0.001.

# Supplemental Figure S1

A

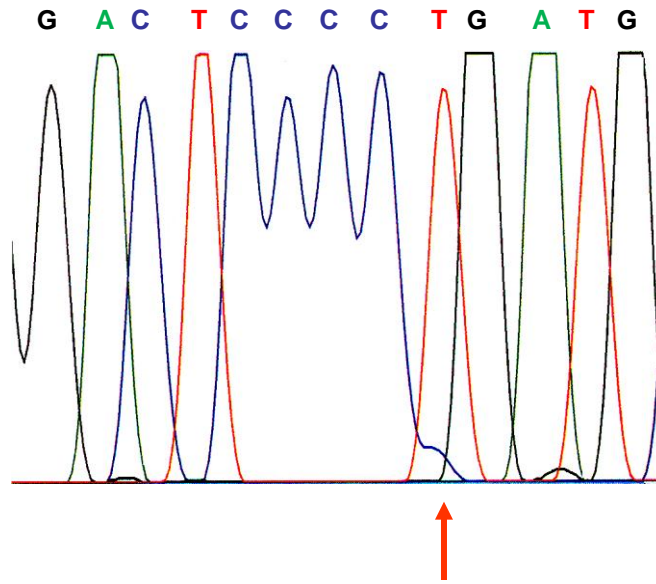

B

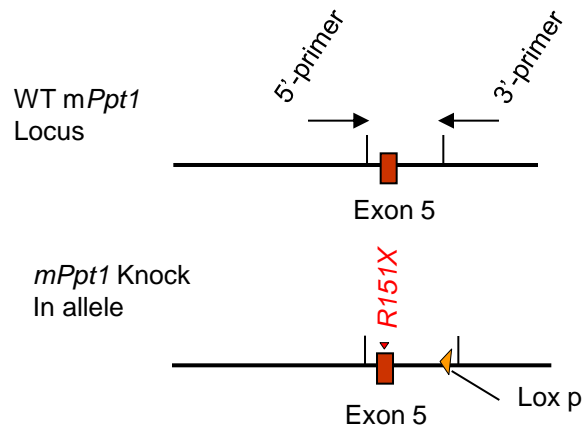

# Supplementary Figure S2

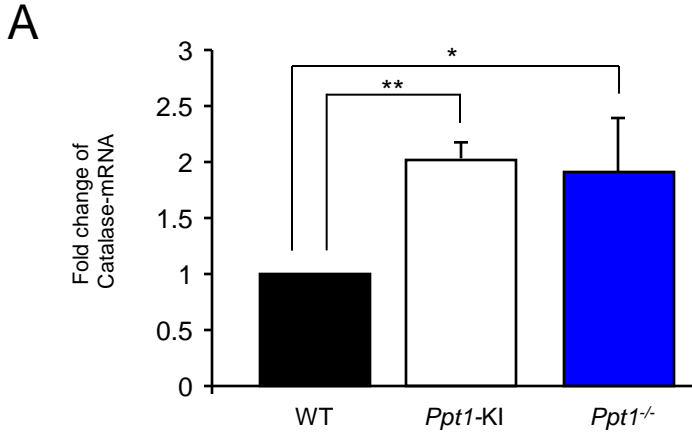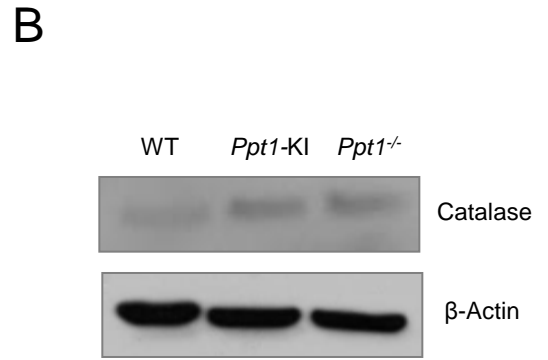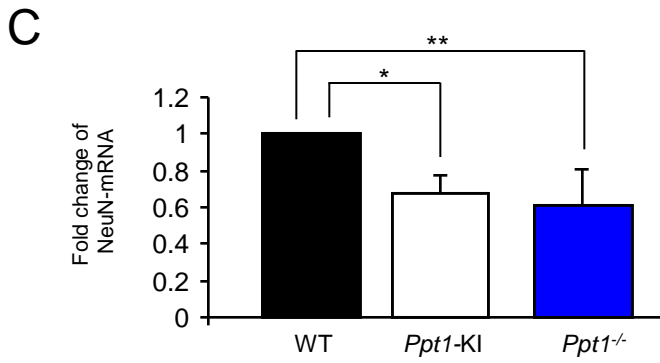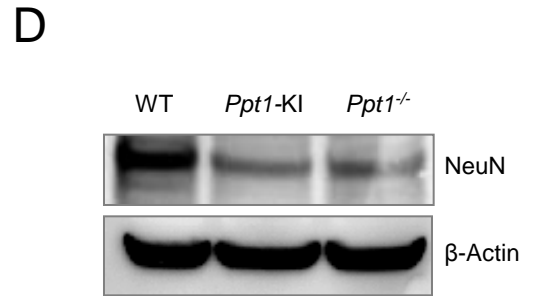

Supplement: acn30001-1006-sd1.pdf [file acn30001-1006-sd1.pdf]
